# Supplementary material for: Phenotypic and Genomic Insights into Biofilm Formation in Antibiotic-Resistant Clinical Coagulase-Negative Staphylococcus Species from South Africa
Source: MDPI journal article supplement (doi:10.3390/genes14010104), 2022-12-29
Supplement: s1 [file s1]

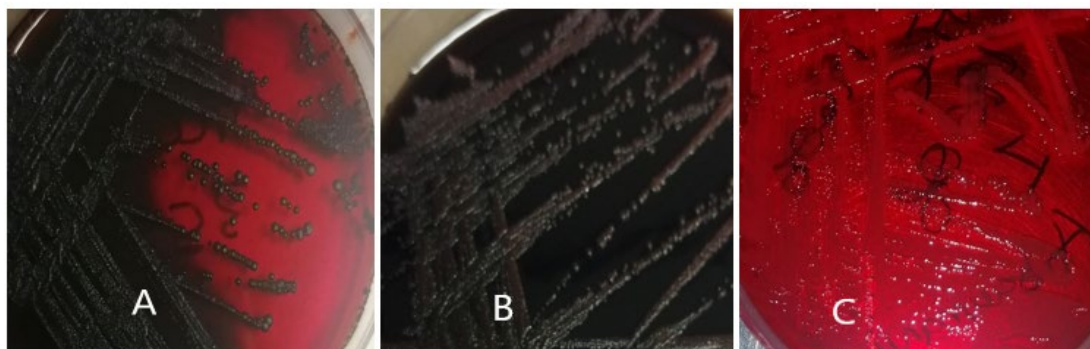

**Figure S1.** Colony colours of isolates on CRA. **(A)** Black colonies indicative of strong biofilm formation, **(B)** brown colonies indicative of moderate biofilm formation, and **(C)** red colonies indicating no biofilm formation.

**Table S1.** CoNS species distribution and antibiotic resistance profile of CoNS isolates.

| Isolate ID | CoNS species                  | Ward type            | OD <sub>570nm</sub> |     |   |     |     |     |     |   |    |    |   |    |    |     |     |     |    |    |     |   |
|------------|-------------------------------|----------------------|---------------------|-----|---|-----|-----|-----|-----|---|----|----|---|----|----|-----|-----|-----|----|----|-----|---|
|            |                               |                      |                     | FOX | P | CPT | CIP | MXF | AZM | E | CN | AK | C | TE | DO | TEC | TGC | LZD | DA | RD | SXT | F |
| C1         | <i>S. epidermidis</i>         | Paediatric OPD       | 0.163               |     | R |     |     |     |     |   |    |    |   |    |    |     |     |     |    |    |     | R |
| C3         | <i>S. epidermidis</i>         | Ward & nursery       | 0.142               | R   | R |     | R   | R   | R   | R | R  |    |   |    |    |     |     |     |    | R  |     | R |
| C4         | <i>S. epidermidis</i>         | A1 paediatric ward   | 0.302               | R   | R |     | R   | R   | R   | R |    |    | R |    |    |     |     |     |    | R  | R   | R |
| C5         | <i>S. hominis ssp hominis</i> | Paediatric OPD       | 0.281               |     | R |     |     |     | R   | R |    |    | R |    |    |     |     |     |    | R  |     | R |
| C6         | <i>S. epidermidis</i>         | Emergency department | 0.2                 |     | R | R   |     |     |     |   |    |    | R |    |    |     |     |     |    |    | R   | R |
| C7         | <i>S. haemolyticus</i>        | 3N ICU               | 0.145               | R   | R |     | R   | R   | R   | R |    |    |   |    |    |     |     |     |    | R  | R   |   |
| C9         | <i>S. epidermidis</i>         | -                    | 0.175               | R   | R |     | R   | R   | R   | R | R  |    |   |    |    | R   |     |     |    |    | R   | R |
| C10        | <i>S. haemolyticus</i>        | ICU                  | 0.167               | R   | R |     | R   | R   | R   | R |    | R  |   |    |    |     |     |     |    | R  | R   |   |

|     |                               |                    |       |   |   |   |   |   |   |  |   |   |   |   |   |   |   |   |   |
|-----|-------------------------------|--------------------|-------|---|---|---|---|---|---|--|---|---|---|---|---|---|---|---|---|
| C11 | <i>S. hominis ssp hominis</i> | Casualty           | 0.197 | R |   |   |   |   |   |  |   |   |   |   |   |   |   |   | R |
| C13 | <i>S. hominis ssp hominis</i> | Neonatal ICU       | 0.264 | R | R | R | R | R | R |  | R | R | R | R | R | R | R | R | R |
| C17 | <i>S. hominis ssp hominis</i> | H1 Medical ward    | 0.343 | R | R |   | R | R | R |  | R |   |   |   |   | R |   |   |   |
| C18 | <i>S. haemolyticus</i>        | KMMC Clinic        | 0.31  |   | R |   |   | R | R |  |   |   |   |   |   |   |   |   | R |
| C19 | <i>S. epidermidis</i>         | Neonatal ICU       | 0.347 | R | R |   |   | R | R |  |   |   |   |   |   |   |   |   | R |
| C20 | <i>S. hominis ssp hominis</i> | H2 Medical ward    | 0.352 |   | R | R |   | R |   |  | R | R | R | R | R | R |   | R | R |
| C21 | <i>S. sciuri</i>              | ICU                | 0.356 | R | R | R | R | R | R |  |   |   |   |   |   | R | R | R |   |
| C22 | <i>S. lentus</i>              | Ward D             | 0.226 | R | R | R | R | R | R |  | R | R |   |   |   |   | R | R |   |
| C23 | <i>S. lentus</i>              | Paediatric OPD     | 0.177 |   | R |   |   |   |   |  |   |   |   |   |   |   |   |   |   |
| C26 | <i>S. lentus</i>              | -                  | 0.207 | R | R |   |   |   |   |  | R | R | R | R | R | R |   | R | R |
| C27 | <i>S. haemolyticus</i>        | Ward D             | 0.224 | R | R |   |   |   |   |  |   |   |   |   |   |   |   |   |   |
| C31 | <i>S. haemolyticus</i>        | A1 Paediatric ward | 0.292 |   | R |   |   | R | R |  |   |   |   |   |   |   |   |   |   |
| C32 | <i>S. sciuri</i>              | E2 Paediatric ICU  | 0.407 | R | R | R | R | R | R |  |   |   |   |   |   | R | R |   |   |
| C35 | <i>S. saprophyticus</i>       | E1 Paediatric ward | 0.194 |   | R | R | R | R | R |  | R | R | R |   |   |   |   |   |   |
| C36 | <i>S. saprophyticus</i>       | Neonatal ICU       | 0.179 | R | R | R |   | R | R |  | R | R | R | R | R | R |   | R | R |
| C37 | <i>S. lentus</i>              | Neonatal ICU       | 0.276 |   | R | R | R | R | R |  | R |   |   |   |   | R | R | R |   |
| C38 | <i>S. epidermidis</i>         | H2 Medical ward    | 0.21  | R | R | R | R | R | R |  |   |   |   |   |   |   |   |   | R |
| C39 | <i>S. lentus</i>              | 5B2 Medical ward   | 0.279 | R | R | R | R | R | R |  | R | R | R |   |   | R | R | R |   |

[illegible]

|      |                               |                       |       |   |   |   |   |   |   |   |   |   |   |  |   |   |
|------|-------------------------------|-----------------------|-------|---|---|---|---|---|---|---|---|---|---|--|---|---|
|      |                               |                       |       | R | R |   |   | R | R |   | R | R | R |  |   | R |
| C68  | <i>S. epidermidis</i>         | 7F<br>Paediatric ward | 0.174 |   |   |   |   |   |   |   |   |   |   |  |   |   |
| C72  | <i>S. lentus</i>              | 2R<br>Surgical ICU    | 0.195 |   | R |   |   |   |   |   |   |   |   |  |   |   |
| C73  | <i>S. lentus</i>              | Ward F                | 0.235 |   | R |   |   |   |   |   |   |   |   |  |   | R |
| C74  | <i>S. epidermidis</i>         | Paediatric OPD        | 0.398 |   | R |   | R |   |   |   |   |   |   |  |   | R |
| C75  | <i>S. lugdunensis</i>         | -                     | 0.26  |   | R |   |   |   |   |   |   |   |   |  |   |   |
| C81  | <i>S. hominis ssp hominis</i> | F2<br>Surgical ward   | 0.251 | R | R |   | R | R | R | R |   |   |   |  | R | R |
| C87  | <i>S. auricularis</i>         | 3N Main               | 0.369 | R | R |   |   | R | R |   | R |   |   |  | R |   |
| C93  | <i>S. lentus</i>              | H1<br>Medical ward    | 0.468 | R | R |   | R | R | R | R |   | R |   |  | R | R |
| C100 | <i>S. haemolyticus</i>        | Emergency department  | 0.346 | R | R |   |   | R | R |   |   |   |   |  |   | R |
| C102 | <i>S. haemolyticus</i>        | Paediatric OPD        | 0.278 | R | R |   | R | R | R | R |   | R | R |  | R | R |
| C104 | <i>S. capitis</i>             | 7F<br>Paediatric ward | 0.37  |   | R |   | R | R | R | R |   | R | R |  |   |   |
| C105 | <i>S. hominis ssp hominis</i> | Paediatric OPD        | 0.315 | R | R |   | R | R |   |   | R | R |   |  | R | R |
| C107 | <i>S. lugdunensis</i>         | -                     | 0.367 |   | R |   |   |   |   |   |   |   |   |  |   |   |
| C110 | <i>S. xylosus</i>             | H2<br>Medical ward    | 0.278 | R | R |   |   |   |   |   |   | R | R |  | R |   |
| C113 | <i>S. xylosus</i>             | Medical OPD           | 0.336 | R | R |   |   | R | R |   |   |   |   |  | R |   |
| C114 | <i>S. sciuri</i>              | Medical OPD           | 0.362 |   | R |   |   | R | R |   |   |   |   |  |   |   |
| C116 | <i>S. hominis ssp hominis</i> | Paediatric OPD        | 0.469 |   | R |   |   | R | R |   |   |   |   |  |   | R |
| C118 | <i>S. hominis ssp hominis</i> | Ward D                | 0.432 | R | R | R |   | R | R |   | R | R |   |  |   | R |



|      |                         |                    |       |   |   |   |   |   |   |   |   |   |   |   |   |
|------|-------------------------|--------------------|-------|---|---|---|---|---|---|---|---|---|---|---|---|
| C135 | <i>S. saprophyticus</i> | Paediatric OPD     | 0.302 | R | R | R | R | R | R | R | R | R | R | R | R |
| C136 | <i>S. succinus</i>      | H Ward             | 0.205 |   | R |   |   | R | R |   |   |   |   |   | R |
| C137 | <i>S. epidermidis</i>   | Ward O             | 0.083 | R | R | R |   | R | R |   |   |   |   | R | R |
| C138 | <i>S. hominis</i>       | H Ward             | 0.279 | R | R |   |   |   |   |   |   |   |   |   | R |
| C139 | <i>S. succinus</i>      | 3N Extension ward  | 0.362 | R | R |   |   | R | R | R |   |   |   | R | R |
| C141 | <i>S. haemolyticus</i>  | 3N Extension ward  | 0.538 | R | R | R | R |   | R |   |   |   |   | R |   |
| C142 | <i>S. succinus</i>      | Paediatric OPD     | 0.497 | R | R |   |   |   |   |   |   |   |   |   | R |
| C143 | <i>S. warneri</i>       | 3N ICU             | 0.426 | R | R |   |   | R | R |   |   | R |   | R | R |
| C144 | <i>S. epidermidis</i>   | 3N Extension ward  | 0.564 | R | R | R | R | R | R |   |   | R |   | R | R |
| C145 | <i>S. epidermidis</i>   | Casualty           | 0.373 | R | R |   |   | R | R |   |   | R |   |   |   |
| C147 | <i>S. xylosus</i>       | Ward and Nursery   | 0.215 | R | R | R | R | R | R |   |   | R |   | R | R |
| C148 | <i>S. xylosus</i>       | D5 Ward            | 0.252 | R | R |   |   | R | R |   |   |   |   |   |   |
| C149 | <i>S. hominis</i>       | KMMC Clinic        | 0.24  | R | R |   |   | R | R |   |   |   |   |   | R |
| C150 | <i>S. succinus</i>      | Paediatric OPD     | 0.293 | R | R |   |   | R | R |   |   | R | R | R | R |
| C151 | <i>S. haemolyticus</i>  | E1 Paediatric Ward | 0.334 | R | R | R | R | R | R |   |   |   |   |   | R |
| C152 | <i>S. haemolyticus</i>  | ICU                | 0.284 | R | R | R | R |   |   |   |   |   |   |   | R |

Abbreviations: FOX, cefoxitin; P, penicillin G; CPT, ceftaroline; CIP, ciprofloxacin; MXF, moxifloxacin; AZM, azithromycin; E, erythromycin; CN, gentamicin; AK, amikacin; C, chloramphenicol; TE, tetracycline; DO, doxycycline; TEC, teicoplanin; TGC, tigecycline; LZD, linezolid; DA, clindamycin; RD, rifampicin; SXT, sulphamethoxazole/trimethoprim; F, nitrofurantoin; R, resistant; OPD, Outpatient Department; ICU, Intensive Care Unit; CRA, Congo Red agar

Black colonies were considered positive for biofilm formation on CRA, brown colonies; pink/red colonies were negative for biofilm formation on CRA while brown colonies on CRA were considered moderate biofilm formers

**Table S2.** CRA characteristics and classification of biofilm-forming capacities of CoNS isolates using different formulas.

| Isolates ID | CoNS species                  | CRA characteristics | OD $\leq$ OD <sub>c</sub> (negative) | OD <sub>c</sub> <OD $\leq$ (2 $\times$ OD <sub>c</sub> ) (weak) | (2 $\times$ OD <sub>c</sub> )<OD $\leq$ (4 $\times$ OD <sub>c</sub> ) (moderate) | (4 $\times$ OD <sub>c</sub> )<OD (strong) | BF = AB-CW |      |          |        | BF=AB/CW |      |          |        |
|-------------|-------------------------------|---------------------|--------------------------------------|-----------------------------------------------------------------|----------------------------------------------------------------------------------|-------------------------------------------|------------|------|----------|--------|----------|------|----------|--------|
|             |                               |                     |                                      |                                                                 |                                                                                  |                                           | negative   | weak | moderate | Strong | negative | weak | moderate | strong |
| C1          | <i>S. epidermidis</i>         | Black               |                                      | ✓                                                               |                                                                                  |                                           | ✓          |      |          |        | ✓        |      |          |        |
| C3          | <i>S. epidermidis</i>         | Black               |                                      | ✓                                                               |                                                                                  |                                           | ✓          |      |          |        | ✓        |      |          |        |
| C4          | <i>S. epidermidis</i>         | Black               |                                      |                                                                 | ✓                                                                                |                                           |            | ✓    |          |        |          | ✓    |          |        |
| C5          | <i>S. hominis ssp hominis</i> | Black               |                                      |                                                                 | ✓                                                                                |                                           |            | ✓    |          |        |          | ✓    |          |        |
| C6          | <i>S. epidermidis</i>         | Black               |                                      | ✓                                                               |                                                                                  |                                           | ✓          |      |          |        | ✓        |      |          |        |
| C7          | <i>S. haemolyticus</i>        | Brown               |                                      | ✓                                                               |                                                                                  |                                           | ✓          |      |          |        | ✓        |      |          |        |
| C9          | <i>S. epidermidis</i>         | Black               |                                      | ✓                                                               |                                                                                  |                                           | ✓          |      |          |        | ✓        |      |          |        |
| C10         | <i>S. haemolyticus</i>        | Brown               |                                      | ✓                                                               |                                                                                  |                                           | ✓          |      |          |        | ✓        |      |          |        |
| C11         | <i>S. hominis ssp hominis</i> | Black               |                                      | ✓                                                               |                                                                                  |                                           | ✓          |      |          |        | ✓        |      |          |        |
| C13         | <i>S. hominis ssp hominis</i> | Black               |                                      |                                                                 | ✓                                                                                |                                           |            | ✓    |          |        |          | ✓    |          |        |
| C17         | <i>S. hominis ssp hominis</i> | Brown               |                                      |                                                                 | ✓                                                                                |                                           |            |      | ✓        |        |          | ✓    |          |        |
| C18         | <i>S. haemolyticus</i>        | Brown               |                                      |                                                                 | ✓                                                                                |                                           |            |      | ✓        |        |          | ✓    |          |        |
| C19         | <i>S. epidermidis</i>         | Black               |                                      |                                                                 | ✓                                                                                |                                           |            |      | ✓        |        |          | ✓    |          |        |
| C20         | <i>S. hominis ssp hominis</i> | Brown               |                                      |                                                                 | ✓                                                                                |                                           |            |      | ✓        |        |          | ✓    |          |        |
| C21         | <i>S. sciuri</i>              | Black               |                                      |                                                                 | ✓                                                                                |                                           |            |      | ✓        |        |          | ✓    |          |        |
| C22         | <i>S. lentus</i>              | Brown               |                                      |                                                                 | ✓                                                                                |                                           |            | ✓    |          |        |          | ✓    |          |        |
| C23         | <i>S. lentus</i>              | Brown               |                                      | ✓                                                               |                                                                                  |                                           | ✓          |      |          |        | ✓        |      |          |        |
| C26         | <i>S. lentus</i>              | Brown               |                                      | ✓                                                               |                                                                                  |                                           |            | ✓    |          |        | ✓        |      |          |        |
| C27         | <i>S. haemolyticus</i>        | Brown               |                                      |                                                                 | ✓                                                                                |                                           |            | ✓    |          |        |          | ✓    |          |        |
| C31         | <i>S. haemolyticus</i>        | Brown               |                                      |                                                                 | ✓                                                                                |                                           |            | ✓    |          |        |          | ✓    |          |        |
| C32         | <i>S. sciuri</i>              | Brown               |                                      |                                                                 | ✓                                                                                |                                           |            |      |          | ✓      |          | ✓    |          |        |
| C35         | <i>S. saprophyticus</i>       | Brown               |                                      | ✓                                                               |                                                                                  |                                           | ✓          |      |          |        | ✓        |      |          |        |
| C36         | <i>S. saprophyticus</i>       | Black               |                                      | ✓                                                               |                                                                                  |                                           | ✓          |      |          |        | ✓        |      |          |        |
| C37         | <i>S. lentus</i>              | Red                 |                                      |                                                                 | ✓                                                                                |                                           |            | ✓    |          |        |          | ✓    |          |        |
| C38         | <i>S. epidermidis</i>         | Black               |                                      |                                                                 | ✓                                                                                |                                           |            | ✓    |          |        |          | ✓    |          |        |
| C39         | <i>S. lentus</i>              | Brown               |                                      |                                                                 | ✓                                                                                |                                           |            | ✓    |          |        |          | ✓    |          |        |



|      |                                         |       |   |   |   |   |   |   |
|------|-----------------------------------------|-------|---|---|---|---|---|---|
| C40  | <i>S. hominis</i> ssp<br><i>hominis</i> | Black |   | ✓ |   | ✓ |   | ✓ |
| C42  | <i>S. haemolyticus</i>                  | Brown |   | ✓ |   | ✓ |   | ✓ |
| C43  | <i>S. lentus</i>                        | Black |   | ✓ |   | ✓ |   | ✓ |
| C44  | <i>S. gallinarum</i>                    | Black | ✓ |   |   | ✓ |   | ✓ |
| C47  | <i>S. hominis</i> ssp<br><i>hominis</i> | Brown |   | ✓ |   | ✓ |   | ✓ |
| C48  | <i>S. hominis</i> ssp<br><i>hominis</i> | Brown | ✓ |   |   | ✓ |   | ✓ |
| C49  | <i>S. capitis</i>                       | Brown |   | ✓ |   | ✓ |   | ✓ |
| C53  | <i>S. lentus</i>                        | Brown |   | ✓ |   | ✓ |   | ✓ |
| C54  | <i>S. haemolyticus</i>                  | Red   |   | ✓ |   | ✓ |   | ✓ |
| C55  | <i>S. lentus</i>                        | Brown |   | ✓ |   | ✓ |   | ✓ |
| C56  | <i>S. lentus</i>                        | Brown |   | ✓ |   | ✓ |   | ✓ |
| C57  | <i>S. epidermidis</i>                   | Black |   | ✓ |   | ✓ |   | ✓ |
| C58  | <i>S. epidermidis</i>                   | Black |   | ✓ |   | ✓ |   | ✓ |
| C61  | <i>S. haemolyticus</i>                  | Brown |   | ✓ |   | ✓ |   | ✓ |
| C66  | <i>S. lentus</i>                        | Brown |   | ✓ |   | ✓ |   | ✓ |
| C68  | <i>S. epidermidis</i>                   | Brown | ✓ |   |   | ✓ |   | ✓ |
| C72  | <i>S. lentus</i>                        | Brown | ✓ |   |   | ✓ |   | ✓ |
| C73  | <i>S. lentus</i>                        | Black |   | ✓ |   | ✓ |   | ✓ |
| C74  | <i>S. epidermidis</i>                   | Brown |   | ✓ |   | ✓ |   | ✓ |
| C75  | <i>S. lugdunensis</i>                   | Brown |   | ✓ |   | ✓ |   | ✓ |
| C81  | <i>S. hominis</i> ssp<br><i>hominis</i> | Black |   | ✓ |   | ✓ |   | ✓ |
| C87  | <i>S. auricularis</i>                   | Black |   | ✓ |   | ✓ |   | ✓ |
| C93  | <i>S. lentus</i>                        | Red   |   |   | ✓ |   | ✓ | ✓ |
| C100 | <i>S. haemolyticus</i>                  | Brown |   | ✓ |   | ✓ |   | ✓ |
| C102 | <i>S. haemolyticus</i>                  | Brown |   | ✓ |   | ✓ |   | ✓ |
| C104 | <i>S. capitis</i>                       | Black |   | ✓ |   | ✓ |   | ✓ |
| C105 | <i>S. hominis</i> ssp<br><i>hominis</i> | Black |   | ✓ |   | ✓ |   | ✓ |
| C107 | <i>S. lugdunensis</i>                   | Black |   | ✓ |   | ✓ |   | ✓ |
| C110 | <i>S. xylosus</i>                       | Brown |   | ✓ |   | ✓ |   | ✓ |
| C113 | <i>S. xylosus</i>                       | Black |   | ✓ |   | ✓ |   | ✓ |
| C114 | <i>S. sciuri</i>                        | Black |   | ✓ |   | ✓ |   | ✓ |

|      |                                         |           |   |   |   |   |   |   |
|------|-----------------------------------------|-----------|---|---|---|---|---|---|
| C116 | <i>S. hominis</i> ssp<br><i>hominis</i> | Black     |   | ✓ |   | ✓ |   | ✓ |
| C118 | <i>S. hominis</i> ssp<br><i>hominis</i> | Brown     |   | ✓ |   | ✓ |   | ✓ |
| C119 | <i>S. xylosus</i>                       | Black     | ✓ |   |   | ✓ |   | ✓ |
| C120 | <i>S. gallinarum</i>                    | Brown     | ✓ |   |   | ✓ |   | ✓ |
| C121 | <i>S. hominis</i> ssp<br><i>hominis</i> | Black     | ✓ |   |   | ✓ |   | ✓ |
| C122 | <i>S. hominis</i> ssp<br><i>hominis</i> | Brown     | ✓ |   | ✓ |   |   | ✓ |
| C123 | <i>S. haemolyticus</i>                  | Brown     | ✓ |   |   | ✓ |   | ✓ |
| C125 | <i>S. arlettae</i>                      | Black     |   | ✓ |   |   | ✓ | ✓ |
| C126 | <i>S. epidermidis</i>                   | Brown     |   | ✓ |   | ✓ |   | ✓ |
| C127 | <i>S. hominis</i>                       | Brown     | ✓ |   |   | ✓ |   | ✓ |
| C128 | <i>S. hominis</i>                       | Brown     | ✓ |   |   | ✓ |   | ✓ |
| C129 | <i>S. haemolyticus</i>                  | Brown     |   | ✓ |   |   | ✓ | ✓ |
| C131 | <i>S. sciuri</i>                        | Brown     | ✓ |   |   | ✓ |   | ✓ |
| C132 | <i>S. sciuri</i>                        | Brown     | ✓ |   |   | ✓ |   | ✓ |
| C133 | <i>S. epidermidis</i>                   | Black     |   | ✓ |   |   | ✓ | ✓ |
| C134 | <i>S. epidermidis</i>                   | Brown     | ✓ |   |   | ✓ |   | ✓ |
| C135 | <i>S. saprophyticus</i>                 | Brown     | ✓ |   |   | ✓ |   | ✓ |
| C136 | <i>S. succinus</i>                      | Brown     | ✓ |   | ✓ |   | ✓ |   |
|      |                                         | No growth | ✓ |   |   |   |   |   |
| C137 | <i>S. epidermidis</i>                   |           |   |   | ✓ |   | ✓ |   |
| C138 | <i>S. hominis</i>                       | Brown     | ✓ |   |   | ✓ |   | ✓ |
| C139 | <i>S. succinus</i>                      | Black     | ✓ |   |   | ✓ |   | ✓ |
| C141 | <i>S. haemolyticus</i>                  | Brown     |   | ✓ |   |   | ✓ | ✓ |
| C142 | <i>S. succinus</i>                      | Black     |   | ✓ |   |   | ✓ | ✓ |
| C143 | <i>S. warneri</i>                       | Brown     |   | ✓ |   | ✓ |   | ✓ |
| C144 | <i>S. epidermidis</i>                   | Black     |   | ✓ |   |   | ✓ | ✓ |
| C145 | <i>S. epidermidis</i>                   | Brown     | ✓ |   |   | ✓ |   | ✓ |
| C147 | <i>S. xylosus</i>                       | Black     | ✓ |   | ✓ |   |   | ✓ |
| C148 | <i>S. xylosus</i>                       | Brown     | ✓ |   |   | ✓ |   | ✓ |
| C149 | <i>S. hominis</i>                       | Black     | ✓ |   | ✓ |   |   | ✓ |
| C150 | <i>S. succinus</i>                      | Brown     | ✓ |   |   | ✓ |   | ✓ |
| C151 | <i>S. haemolyticus</i>                  | Brown     | ✓ |   |   | ✓ |   | ✓ |

|               |                        |       |   |   |   |
|---------------|------------------------|-------|---|---|---|
| C152          | <i>S. haemolyticus</i> | Brown | ✓ | ✓ | ✓ |
| ATCC<br>35984 | <i>S. epidermidis</i>  |       | ✓ | ✓ | ✓ |
